# Supplementary material for: PCP4 regulates Purkinje cell excitability and cardiac rhythmicity
Source: JCI journal article supplement (doi:10.1172/jci77495), 2014-10-07
Supplement: sd1 [file 1]

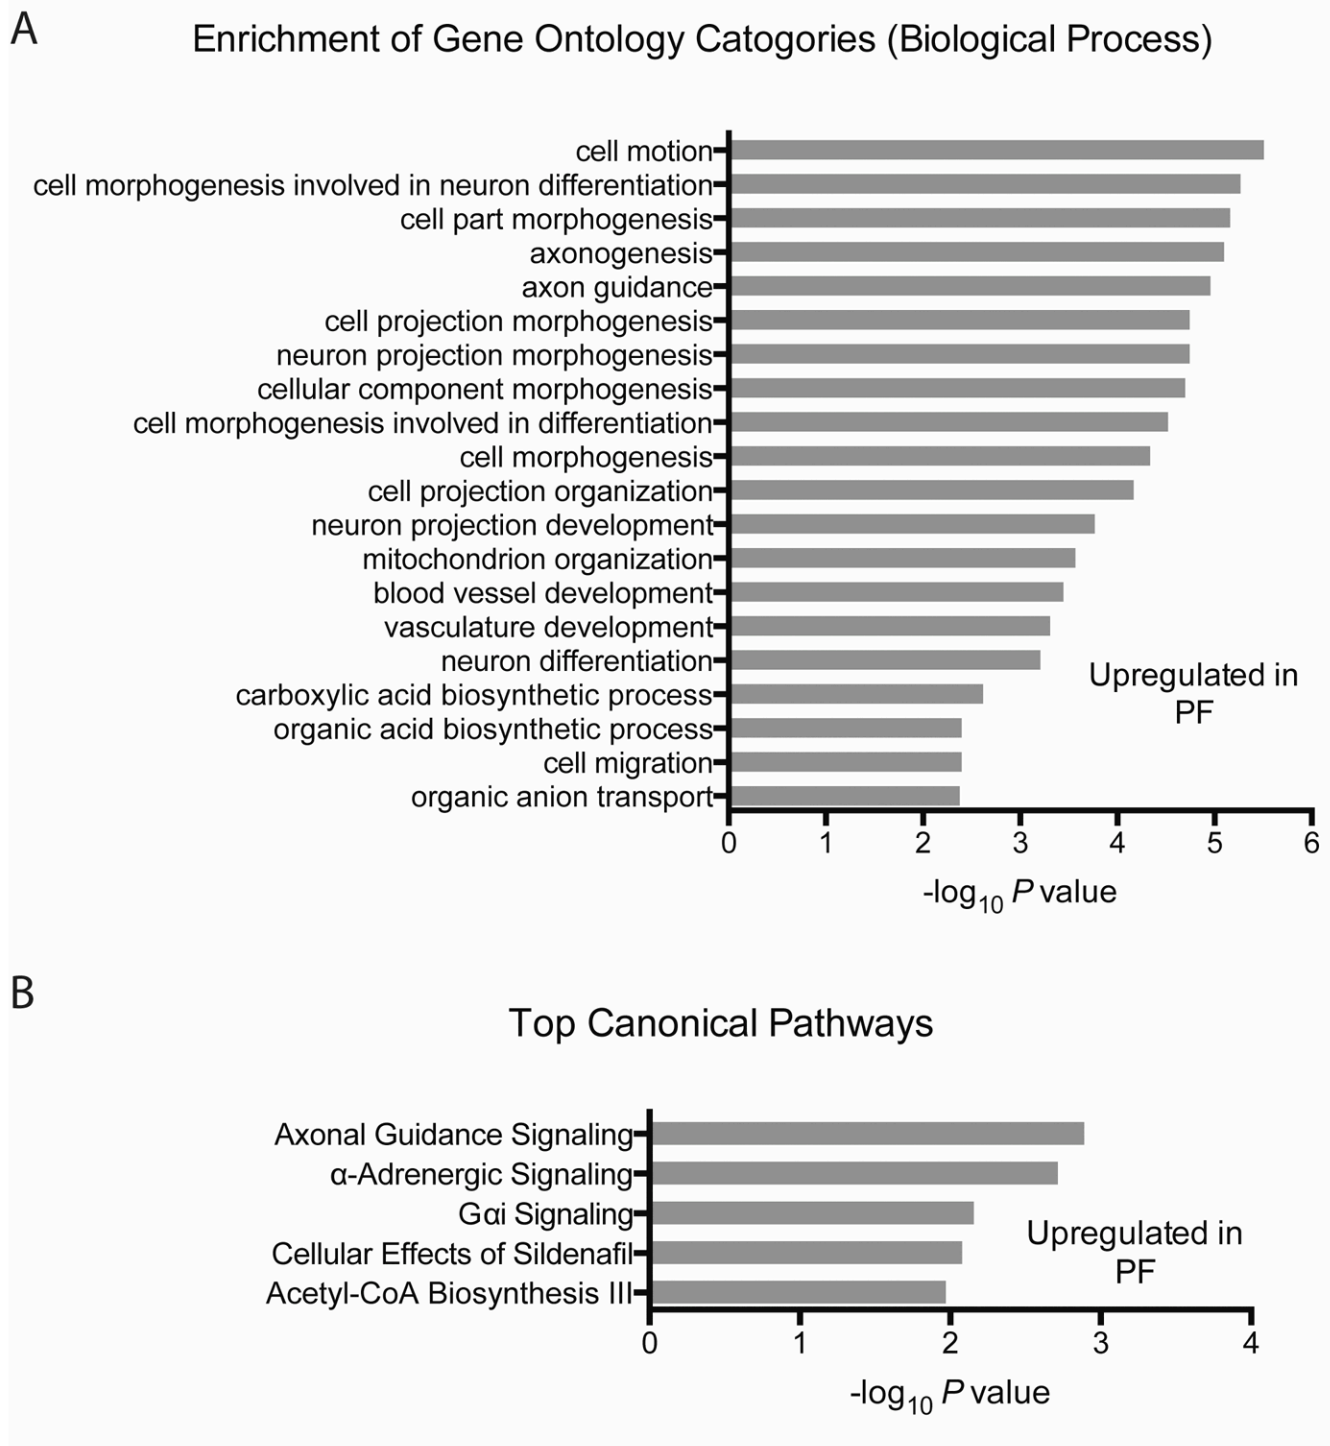

**Supplemental Figure 1.** Gene ontology functional analysis and canonical pathway analysis (**A**) Gene ontology categories (biological process) for upregulated cardiac Purkinje cell specific genes by DAVID analysis. The top 20 categories are shown. (**B**) Enriched canonical pathway in cardiac Purkinje cells as determined via Ingenuity IPA analysis.

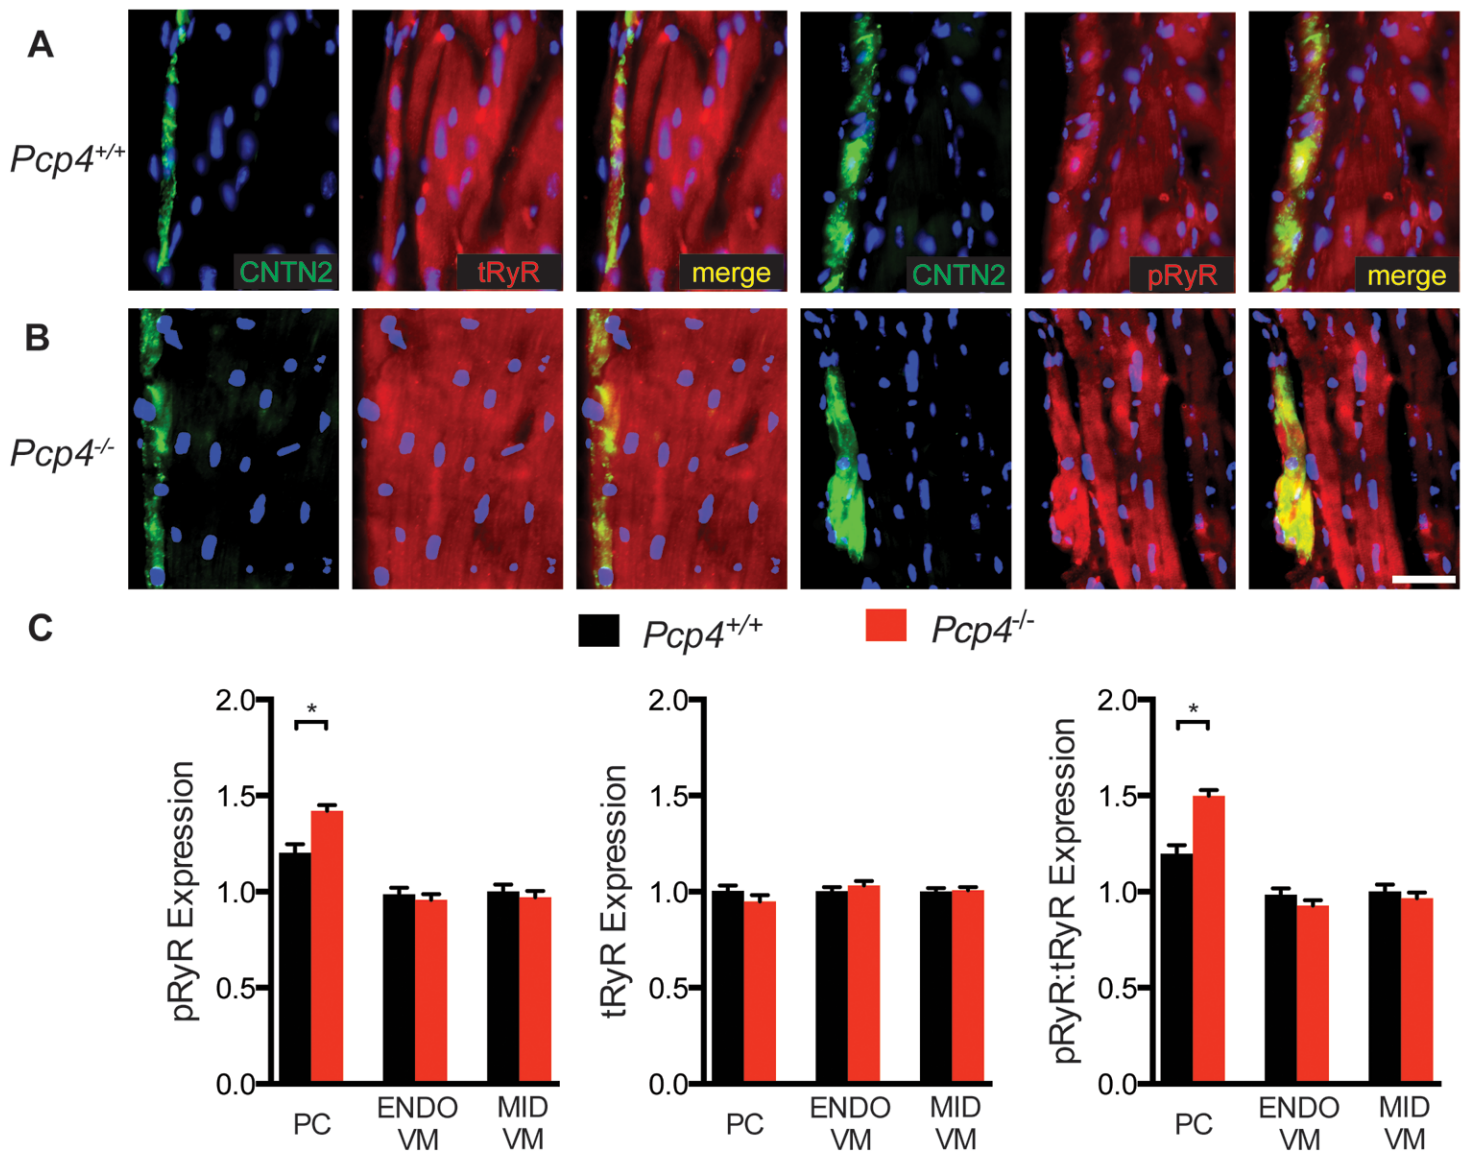

**Supplemental Figure 2.** Expression patterns of total RyR and phospho-Ser2814-RyR in *Pcp4*-null and control hearts. (**A** and **B**) Representative immunofluorescent staining of total RyR (tRyR) and phospho-Ser2814-RyR (pRyR) in serial sections of (**A**) control and (**B**) *Pcp4*-null hearts. CNTN2 expression identifies PCs. (**C**) Quantitative assessment of the abundance pRyR, tRyR, and the ratio of pRyR : tRyR as assessed by pixel intensity measurements within distinct compartments of *Pcp4*-null and control animals: Purkinje network (PC; 10 - 40  $\mu$ m from endocardium), subendocardial VMs (ENDO VM; 75 - 125  $\mu$ m from endocardium) and mid-myocardial VMs (MID VM; 250-300  $\mu$ m from endocardium). Scale, 50  $\mu$ m. The data are mean  $\pm$  SEM \**P* < 0.05.

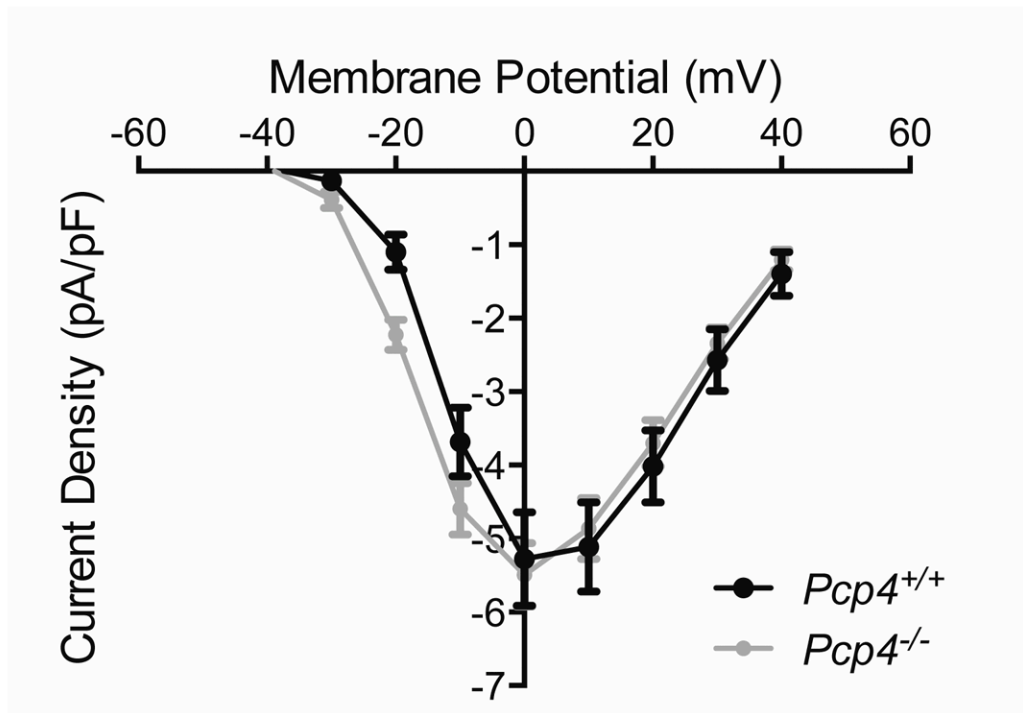

**Supplemental Figure 3.** Comparison of current-voltage (I-V) relationship of  $I_{Ca}$  in *Pcp4*-null ( $n = 9$ ) and control ( $n = 7$ ) VMs. Representative whole cell recordings of  $I_{Ca}$  evoked by voltage steps from -40 to +40 mV in 10 mV increments from a holding potential of -50 mV with a 30 ms prepulse to -30 mV. The data are mean  $\pm$  SEM. No significant differences by one-way ANOVA.

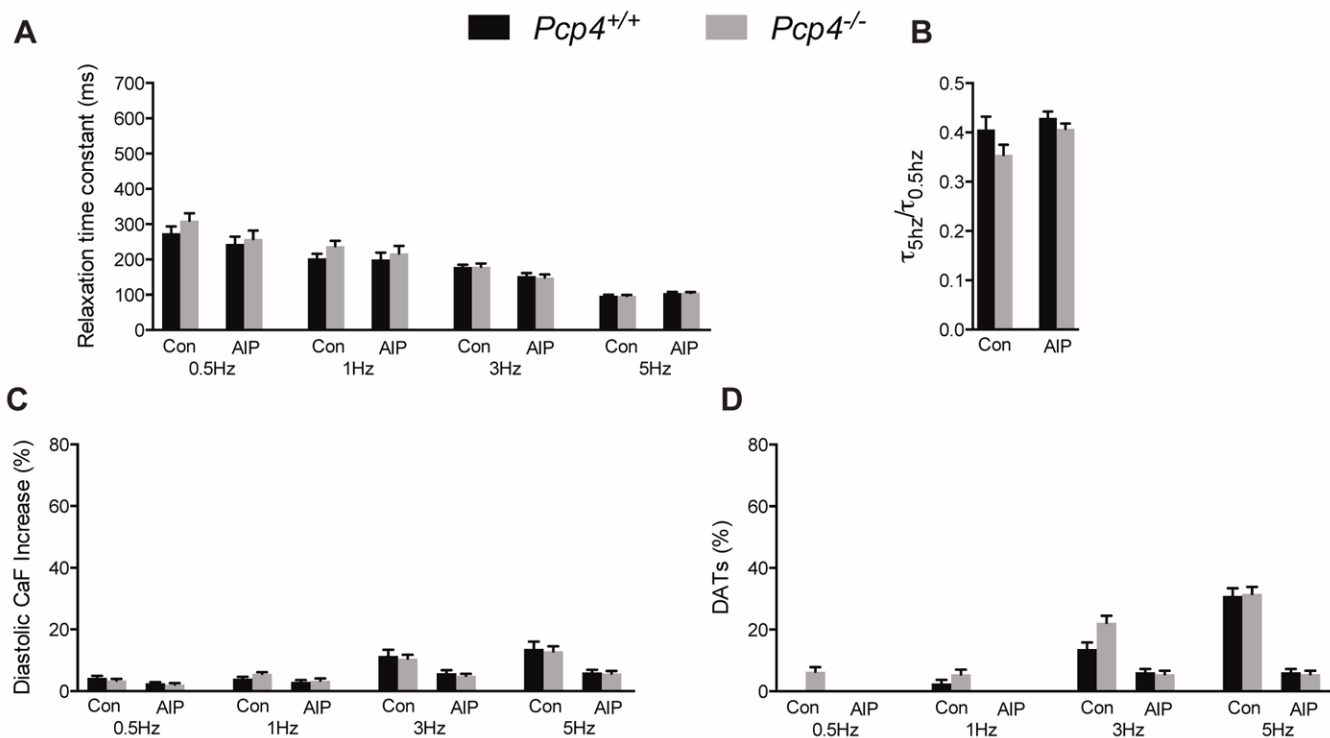

**Supplemental Figure 4.** Effect of *Pcp4*-null mutation on ventricular myocyte calcium cycling. (**A** and **B**) Kinetics of intracellular calcium decay. (**A**) The relaxation time constant ( $\tau$ ) at various stimulation frequencies and (**B**) the frequency dependent acceleration of relaxation (FDAR) index ( $\tau_{5\text{Hz}}/\tau_{0.5\text{Hz}}$ ) between *Pcp4*-null VMs and control VMs in the presence or absence of AIP. Comparison of (**C**) the intracellular calcium concentration with repetitive stimulation and (**D**) the frequency of delayed aftertransients (DATs) between VMs of *Pcp4*-null and control mice at various stimulation frequencies in the presence or absence of AIP. No EATs were observed in VMs of either genotype. Con, vehicle. For **A-C**,  $n = 30-45$  cells per group. For **D**  $n = 4-6$  hearts per group. 8-12 cells were recorded from each heart. The data are mean  $\pm$  SEM. No significant differences by one-way ANOVA.

**A** *Pcp4*<sup>-/-</sup>: BVT

Lead I

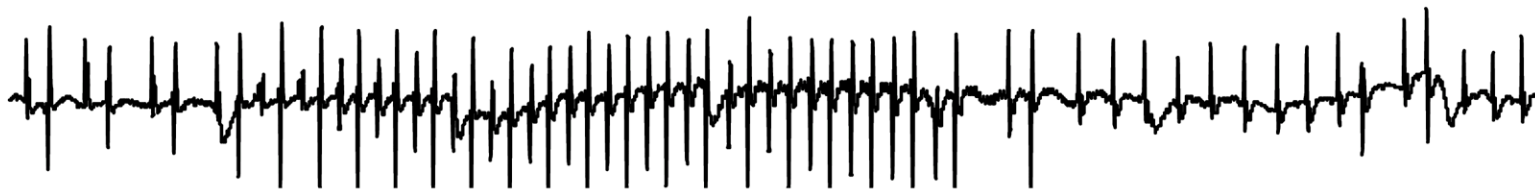

Lead III

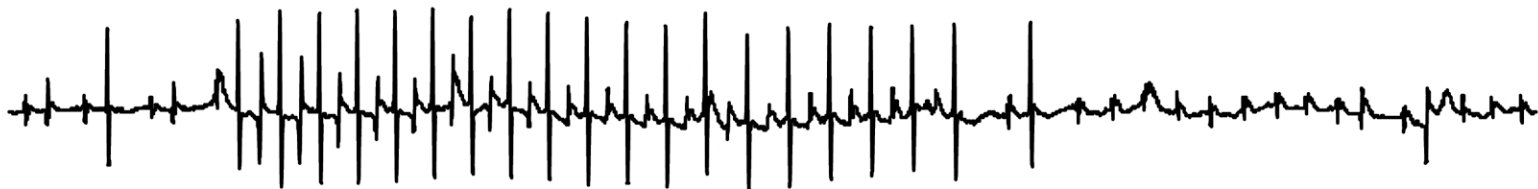

Lead II

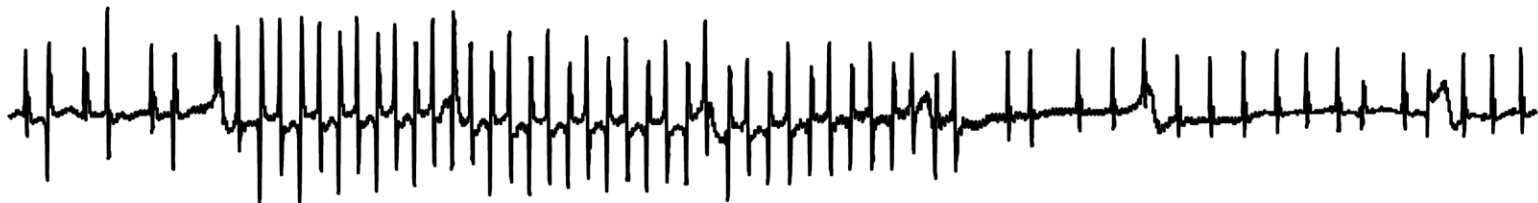

**B** *Pcp4*<sup>-/-</sup>: Baseline

+ CE: First-degree HB

+ CE: Second-degree HB Mobitz Type I

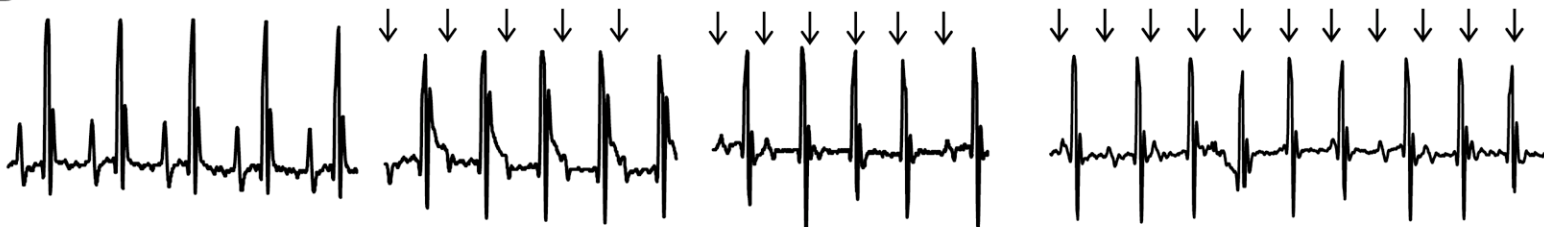

**C** *Pcp4*<sup>+/+</sup> + CE + AT

*Pcp4*<sup>-/-</sup> + CE + AT

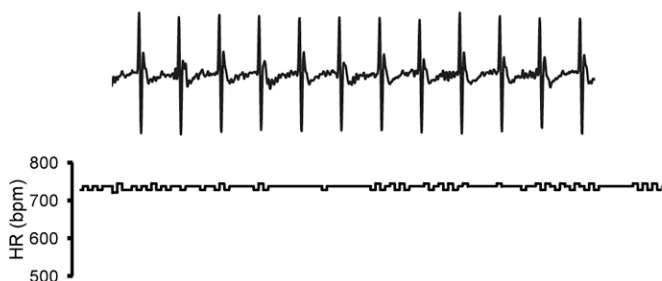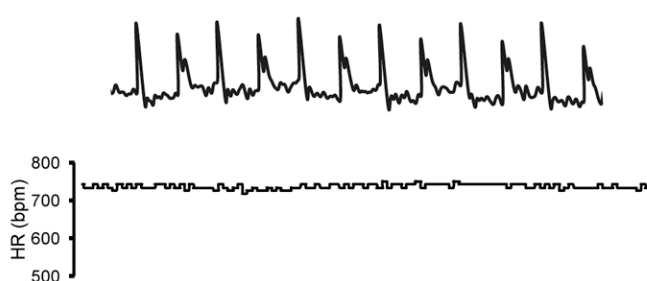

**Supplemental Figure 5.** ECG tracings of arrhythmias observed in *Pcp4*-null mice. **(A)** Representative 3 lead ECG (I, II, III) in mutant mouse after administration of caffeine and epinephrine (CE) demonstrates bidirectional ventricular tachycardia preceded by PVCs in bigeminy. **(B)** Representative mutant mouse ECG at baseline, along with examples of CE induced 1<sup>st</sup> and 2<sup>nd</sup> degree Mobitz type I heart block. Arrows denote P waves. In examples of 2<sup>nd</sup> degree Mobitz type I heart block, note progressive PR interval prolongation, progressive RR interval shortening, and grouped beating. **(C)** Representative ECG tracings and graphical plot of heart rate in mutant and WT mice after administration of Caffeine, Epinephrine(CE), and atropine (AT)

## Supplemental Tables

**Supplemental Table 1.** Effect of *Pcp4*-null mutation and cardiac disease models on echocardiographic parameters.

|                                            | <i>Pcp4</i> <sup>+/+</sup> | <i>Pcp4</i> <sup>-/-</sup> | C57BL/6      | C57BL/6 + PE | C57BL/6 + TAC |
|--------------------------------------------|----------------------------|----------------------------|--------------|--------------|---------------|
| N                                          | 5                          | 5                          | 6            | 3            | 4             |
| Heart Rate (BPM)                           | 424.7 + 16.5               | 448.9 + 29.2               | 450.6 + 10.7 | 480.1 + 26.2 | 478.2 + 32.3  |
| End Diastolic Volume (ul)                  | 81.1 + 1.4                 | 80.7 + 1.5                 | 77.3 + 2.8   | 52.5 + 2.6*  | 113.4 + 13.1* |
| End Systolic Volume (ul)                   | 30.6 + 1.7                 | 30.7 + 2.4                 | 32.0 + 1.6   | 17.4 + 2.0*  | 81.1 + 15.0*  |
| Cardiac Output (ml/min)                    | 21.4 + 0.7                 | 22.5 + 1.9                 | 20.5 + 1.0   | 16.9 + 1.6*  | 15.2 + 0.6*   |
| Ejection Fraction (%)                      | 62.3 + 2.2                 | 62.1 + 2.3                 | 58.7 + 0.6   | 66.9 + 2.1*  | 30.0 + 4.6*   |
| SX Fractional Shortening (%)               | 28.7 + 0.6                 | 27.6 + 1.7                 | 29.4 + 1.2   | 45.3 + 3.5*  | 22.5 + 3.2*   |
| Stroke Volume (ul)                         | 50.5 + 2.2                 | 50.0 + 1.0                 | 45.4 + 1.2   | 35.1 + 0.7*  | 32.3 + 2.3*   |
| LV Anterior Wall Thickness, diastole (mm)  | 0.79 + 0.03                | 0.80 + 0.01                | 0.85 + 0.05  | 1.07 + 0.05* | 1.13 + 0.04*  |
| LV Anterior Wall Thickness, systole (mm)   | 1.25 + 0.01                | 1.25 + 0.03                | 1.26 + 0.02  | 1.75 + 0.02* | 1.78 + 0.12*  |
| LV Posterior Wall Thickness, diastole (mm) | 0.79 + 0.01                | 0.84 + 0.02                | 0.80 + 0.04  | 1.04 + 0.02* | 1.24 + 0.09*  |
| LV Posterior Wall Thickness, systole (mm)  | 1.21 + 0.03                | 1.21 + 0.02                | 1.20 + 0.04  | 1.71 + 0.07* | 1.71 + 0.14*  |

**Supplemental Table 2.** Effect of *Pcp4*-null mutation and cardiac disease models on electrocardiographic parameters.

|                  | <i>Pcp4</i> <sup>+/+</sup> | <i>Pcp4</i> <sup>-/-</sup> | C57BL/6      | C57BL/6 + PE | C57BL/6 + TAC |
|------------------|----------------------------|----------------------------|--------------|--------------|---------------|
| N                | 5                          | 5                          | 6            | 3            | 4             |
| Heart Rate (BPM) | 458.7 + 36.9               | 432.2 + 27.5               | 431.7 + 17.1 | 423.4 + 38.6 | 445.9 + 37.1  |
| PR (ms)          | 40.2 + 1.4                 | 39.1 + 1.0                 | 39.9 + 1.8   | 42.4 + 2.8   | 47.4 + 1.8*   |
| QRS (ms)         | 11.2 + 0.3                 | 11.5 + 0.6                 | 11.8 + 0.3   | 16.4 + 0.8*  | 17.2 + 1.2*   |
| QT (ms)          | 19.9 + 0.6                 | 20.8 + 0.5                 | 20.3 + 0.8   | 24.2 + 1.3*  | 24.7 + 1.7*   |
